# Supplementary material for: Nailfold capillaroscopy microscopy - an interdisciplinary appraisal
Source: Atypon-hosted journal article supplement (doi:10.1024/0301-1526/a000553), 2016-09-01
Supplement: 0301-1526_a000553_esm9.pdf [file 0301-1526_a000553_esm9.pdf]

A microscopic image showing a biological specimen. A prominent, thin, red, wavy structure is visible in the upper central region. A white letter 'N' is positioned below this structure. The background is a uniform, light reddish-brown color. In the bottom right corner, there is a scale bar labeled '2000µm'.

N

2000µm
