# Supplementary material for: Nailfold capillaroscopy microscopy - an interdisciplinary appraisal
Source: Atypon-hosted journal article supplement (doi:10.1024/0301-1526/a000553), 2016-09-01
Supplement: 0301-1526_a000553_esm12.pdf [file 0301-1526_a000553_esm12.pdf]

V

V

B

N

1000μm
