# Supplementary figures and images for: Nailfold capillaroscopy microscopy - an interdisciplinary appraisal
Source: Atypon-hosted journal article supplement (doi:10.1024/0301-1526/a000553), 2016-09-01

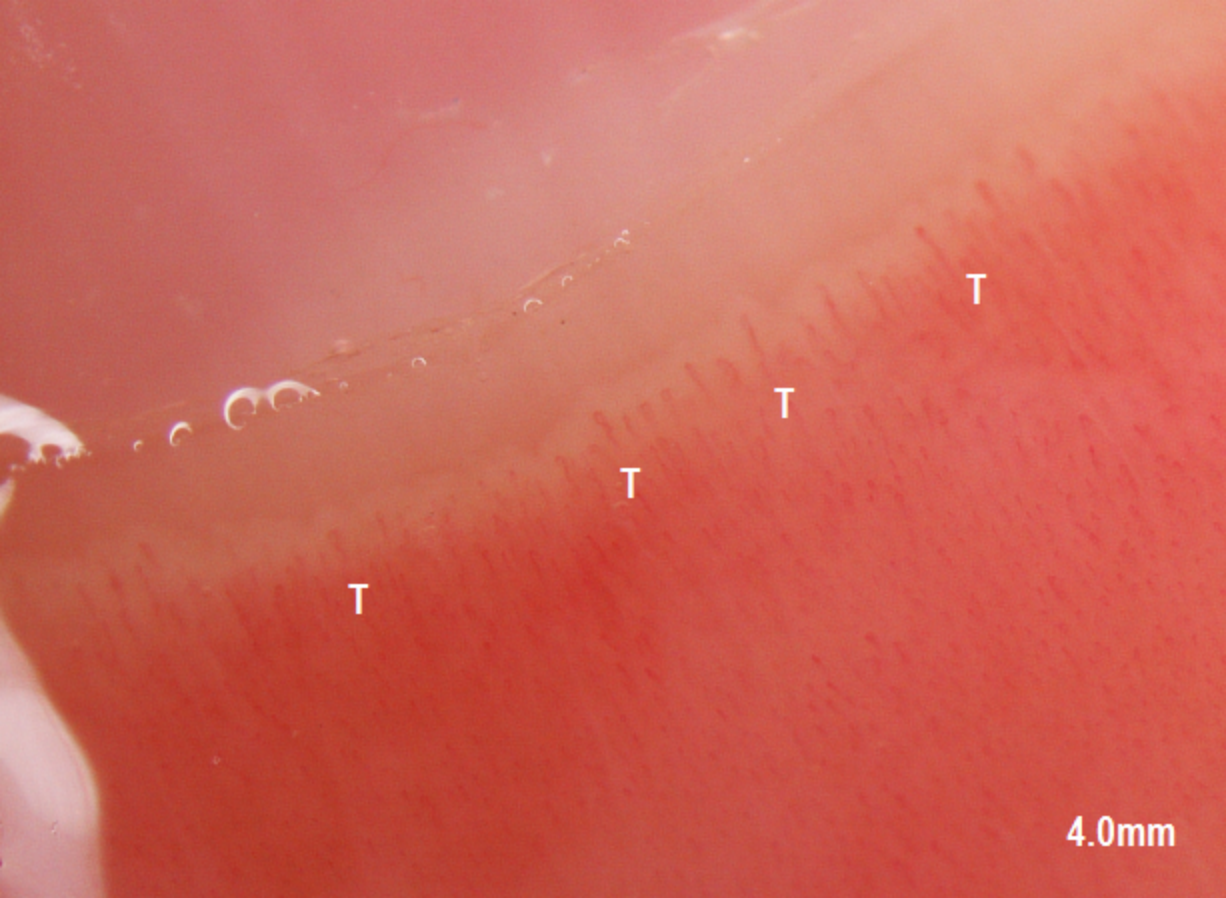

4.0mm

Supplement: 0301-1526_a000553_esm1.pdf [file 0301-1526_a000553_esm1.pdf]

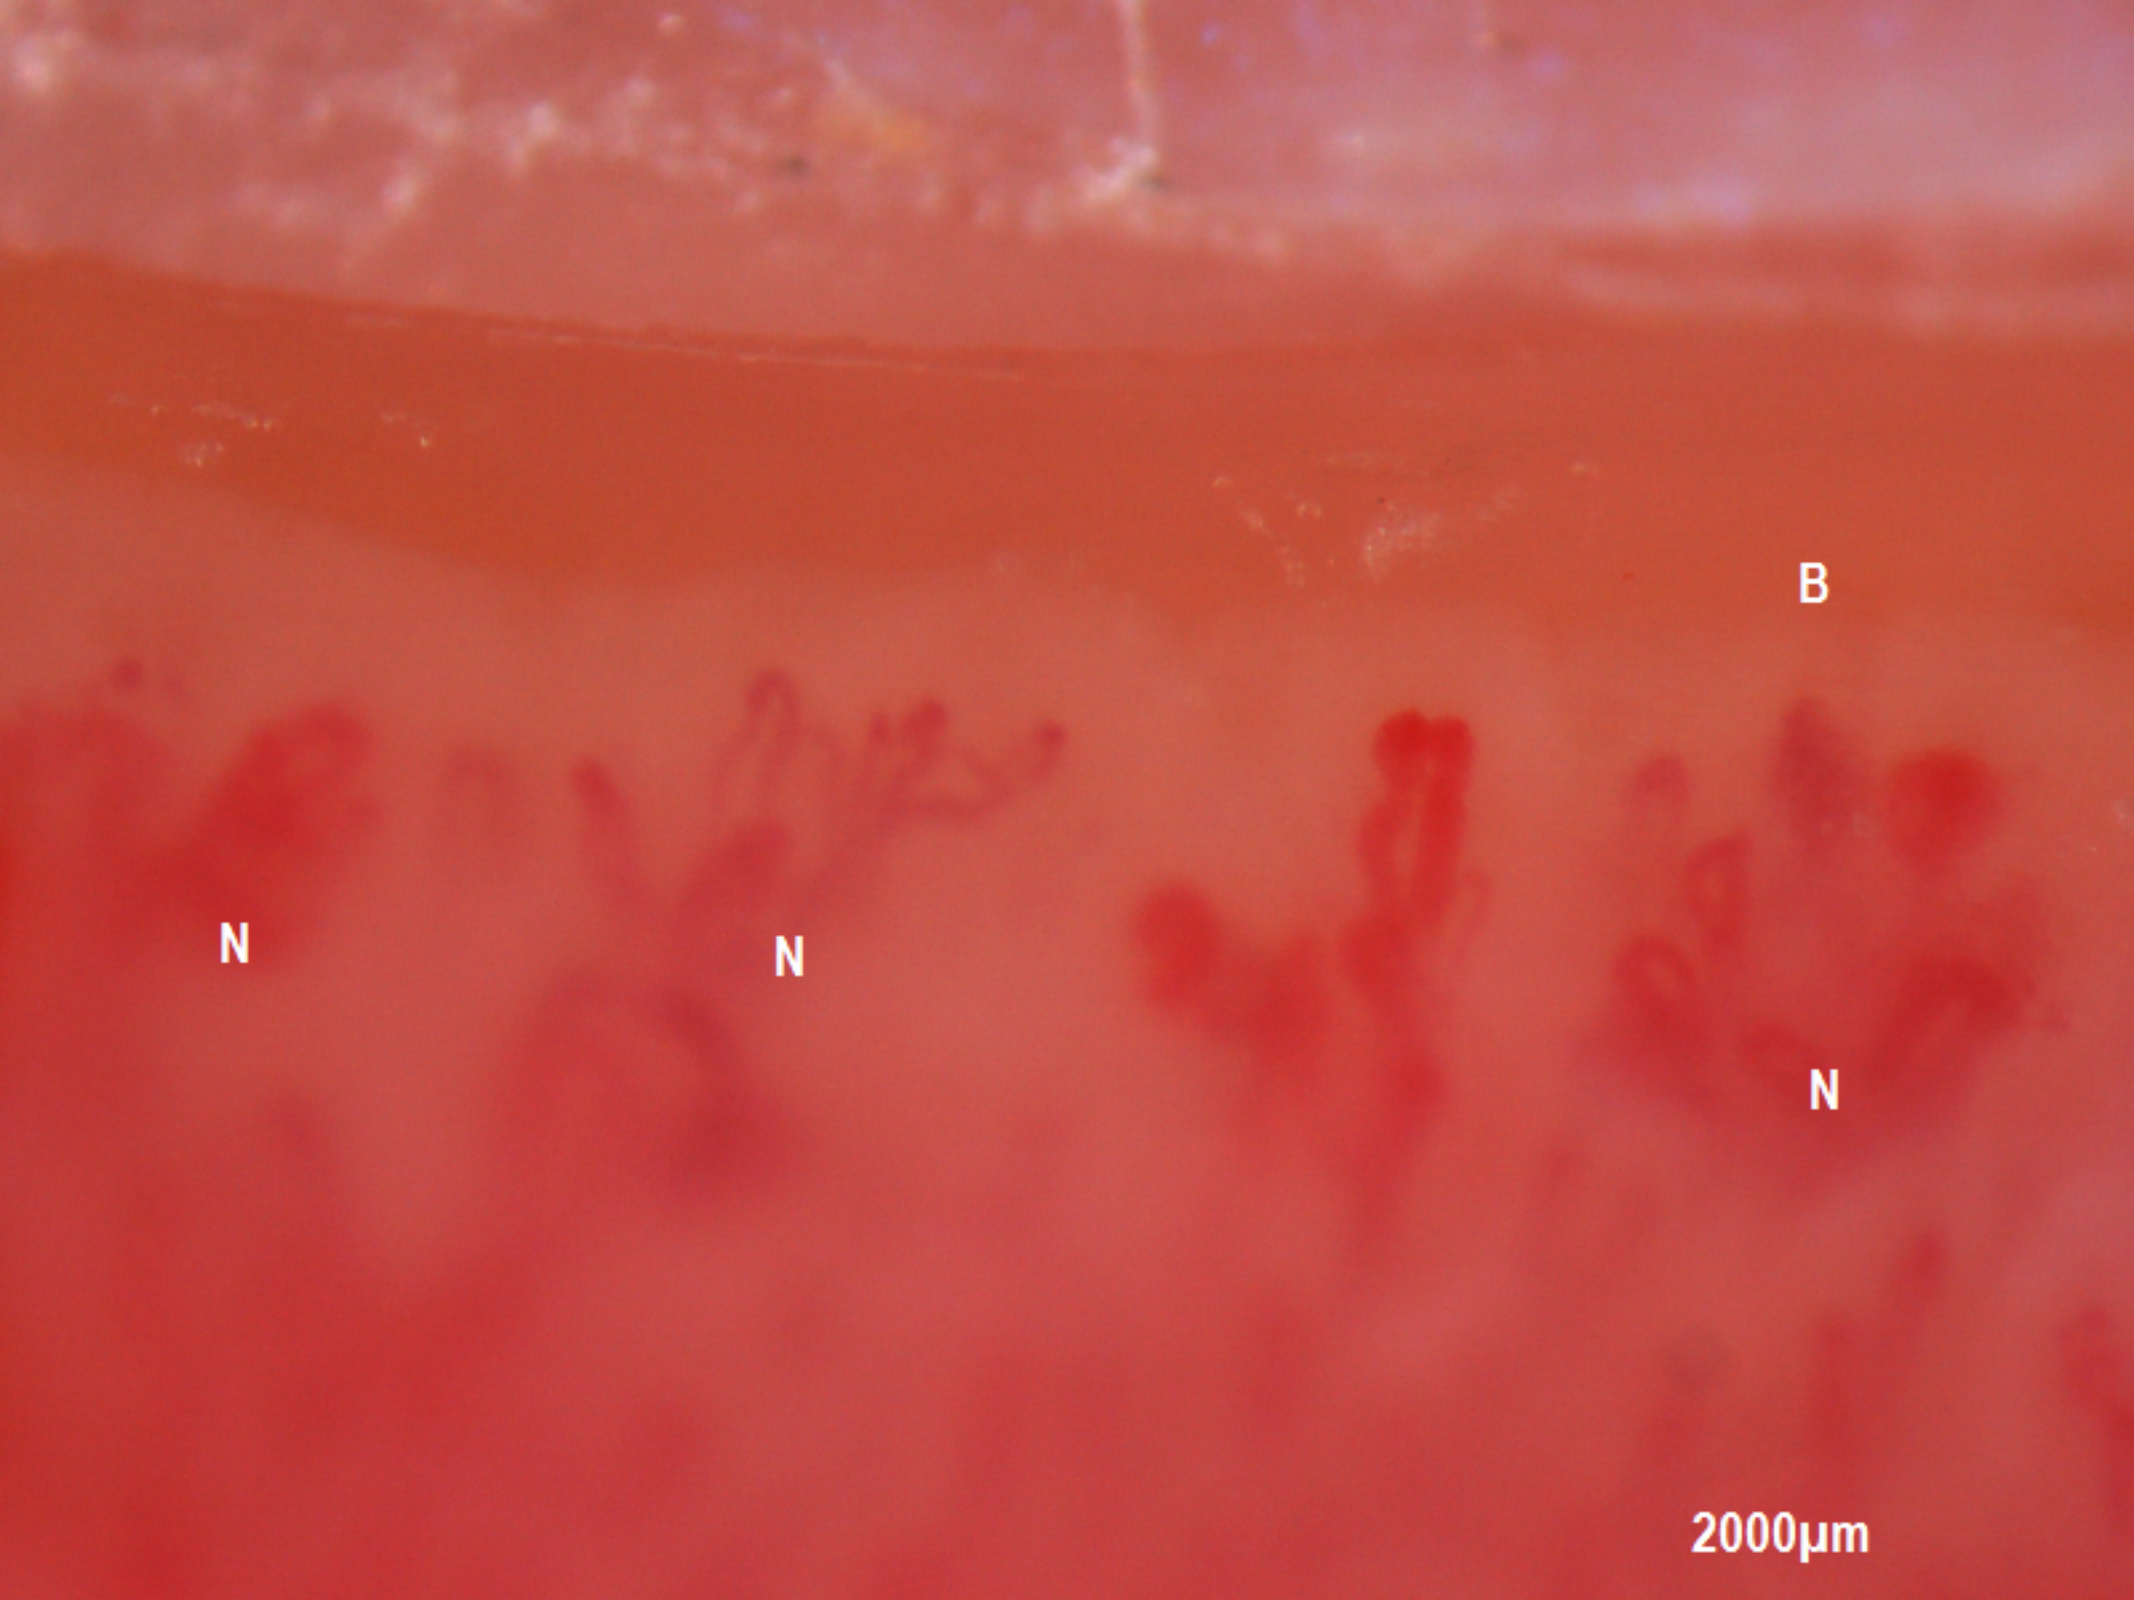

B

N

N

N

2000µm

Supplement: 0301-1526_a000553_esm10.pdf [file 0301-1526_a000553_esm10.pdf]

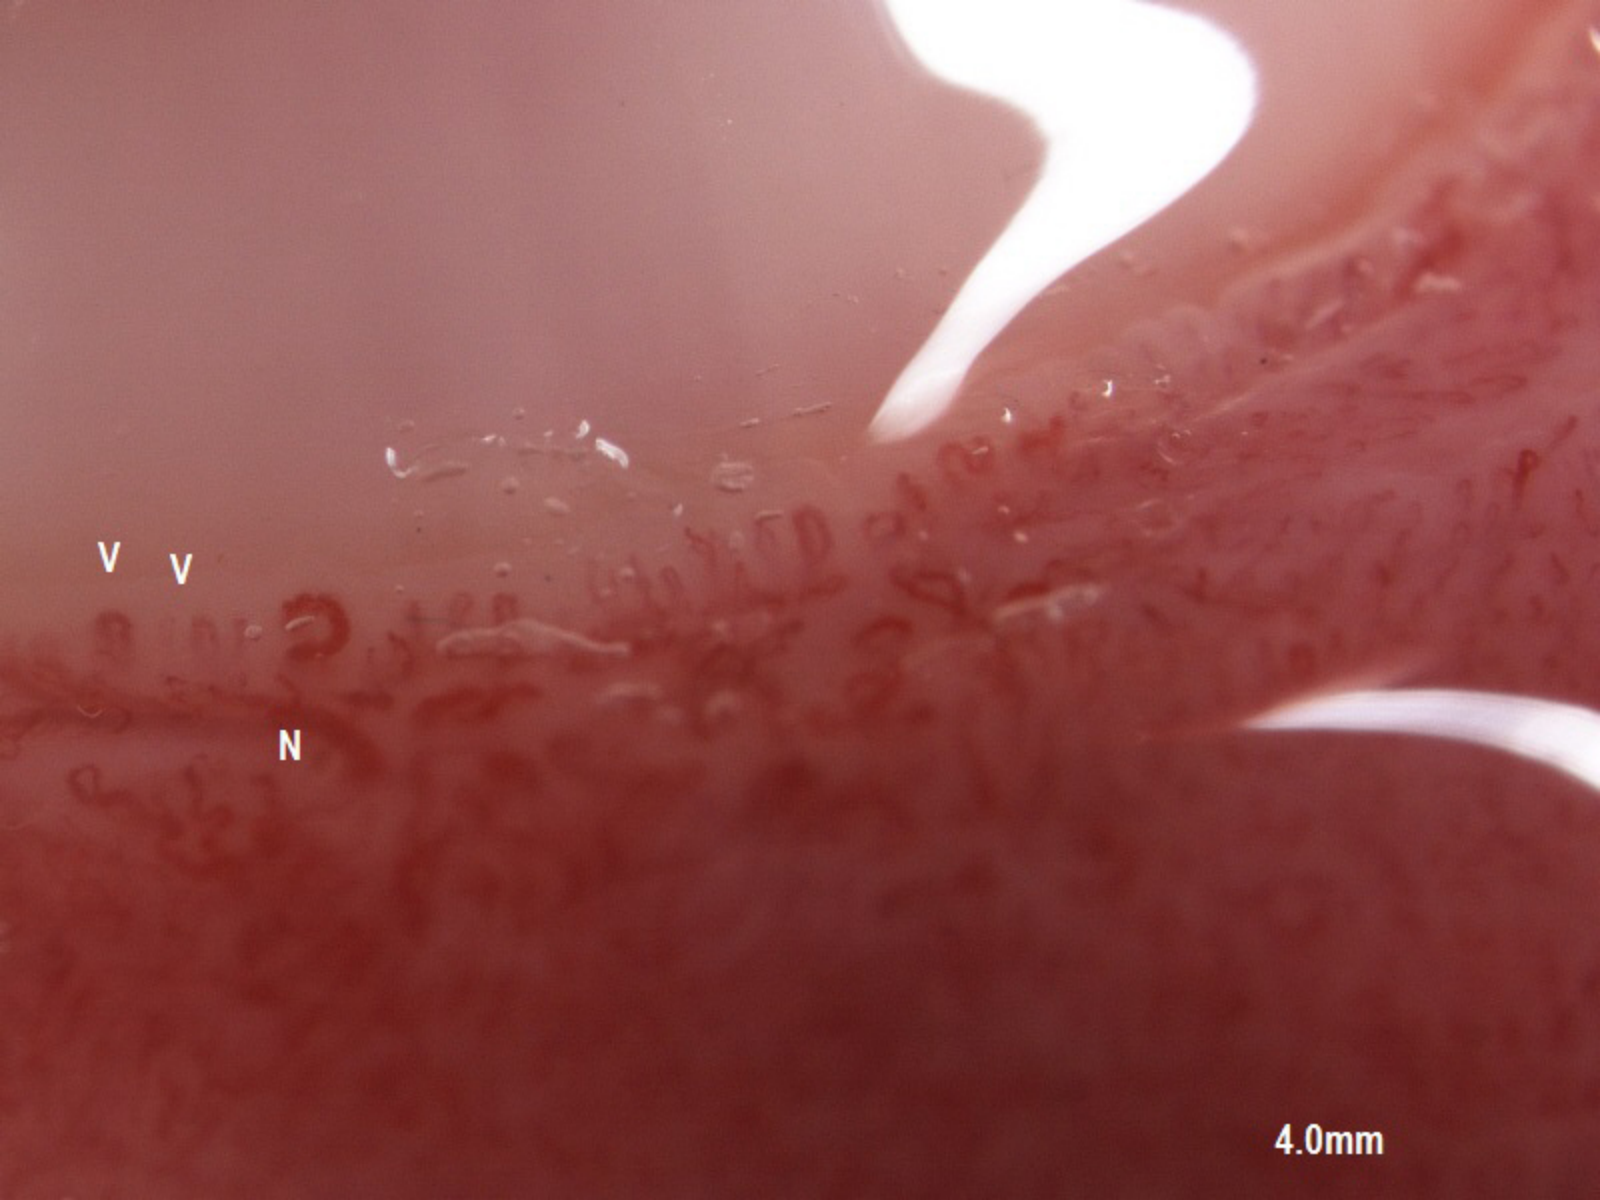

V V

N

4.0mm

Supplement: 0301-1526_a000553_esm11.pdf [file 0301-1526_a000553_esm11.pdf]

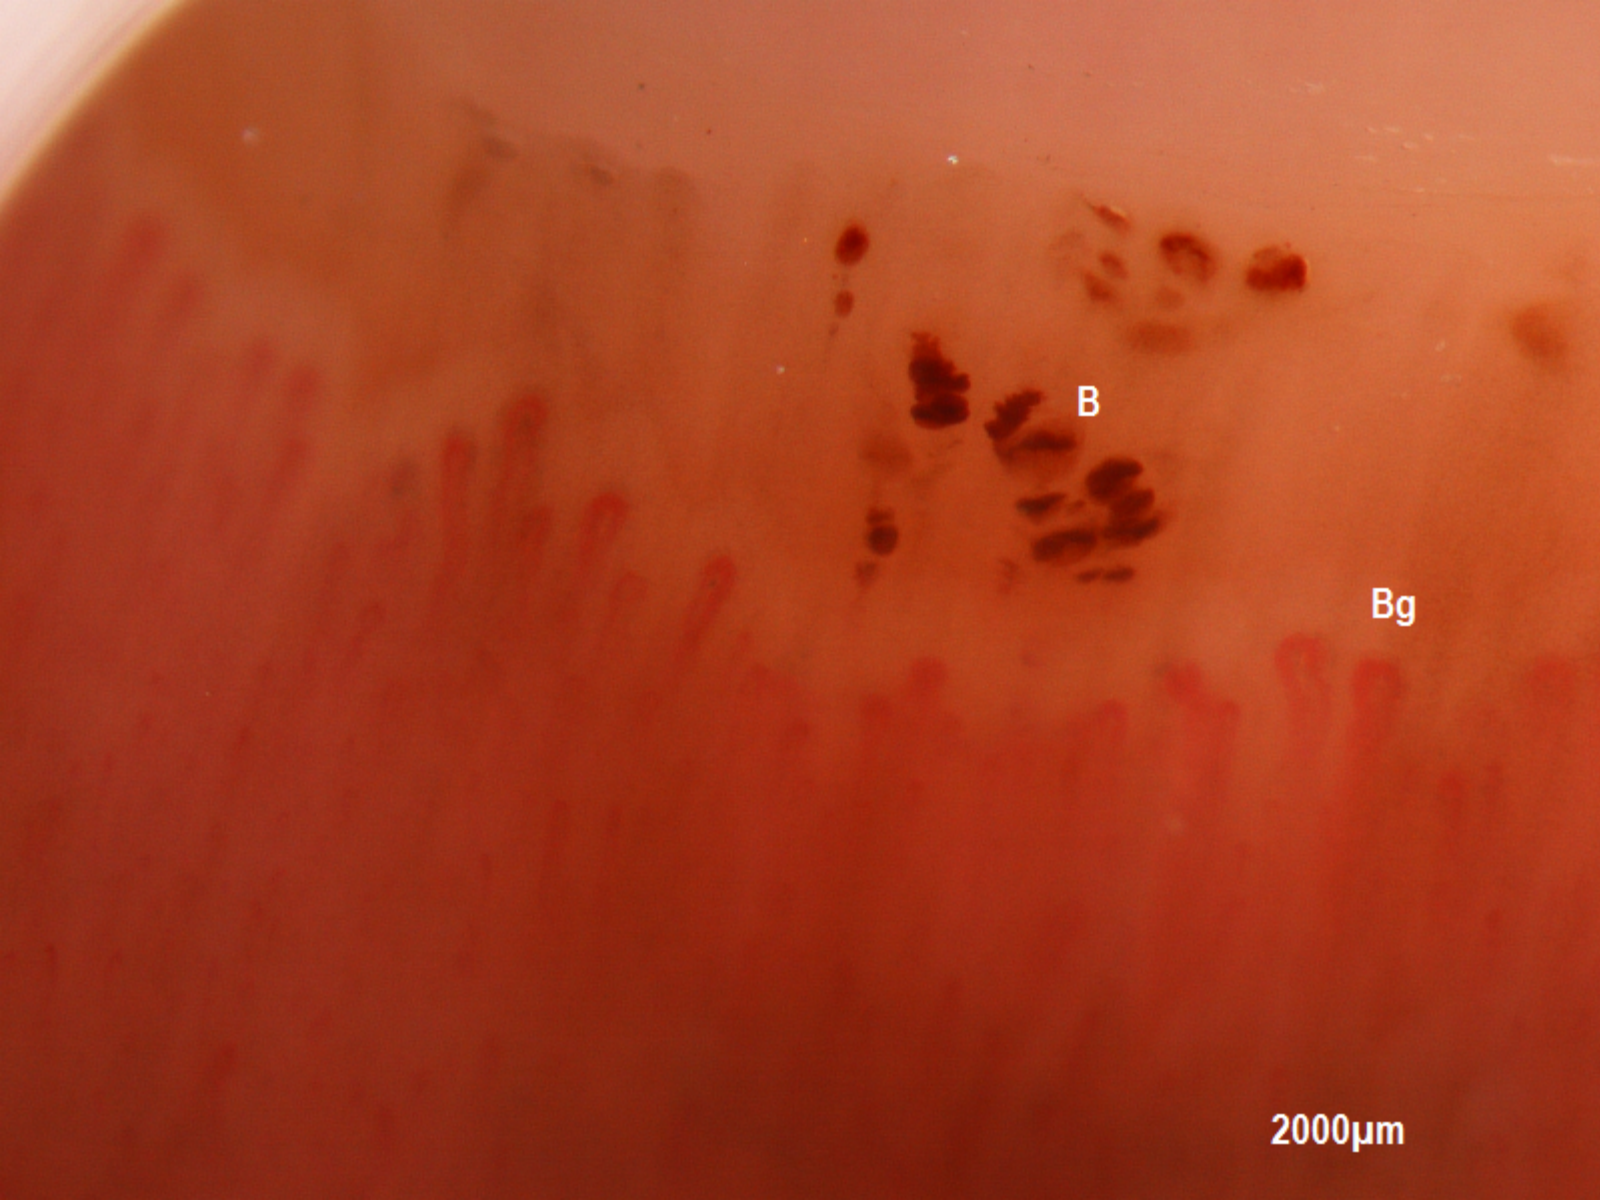

B

Bg

2000µm

Supplement: 0301-1526_a000553_esm13.pdf [file 0301-1526_a000553_esm13.pdf]

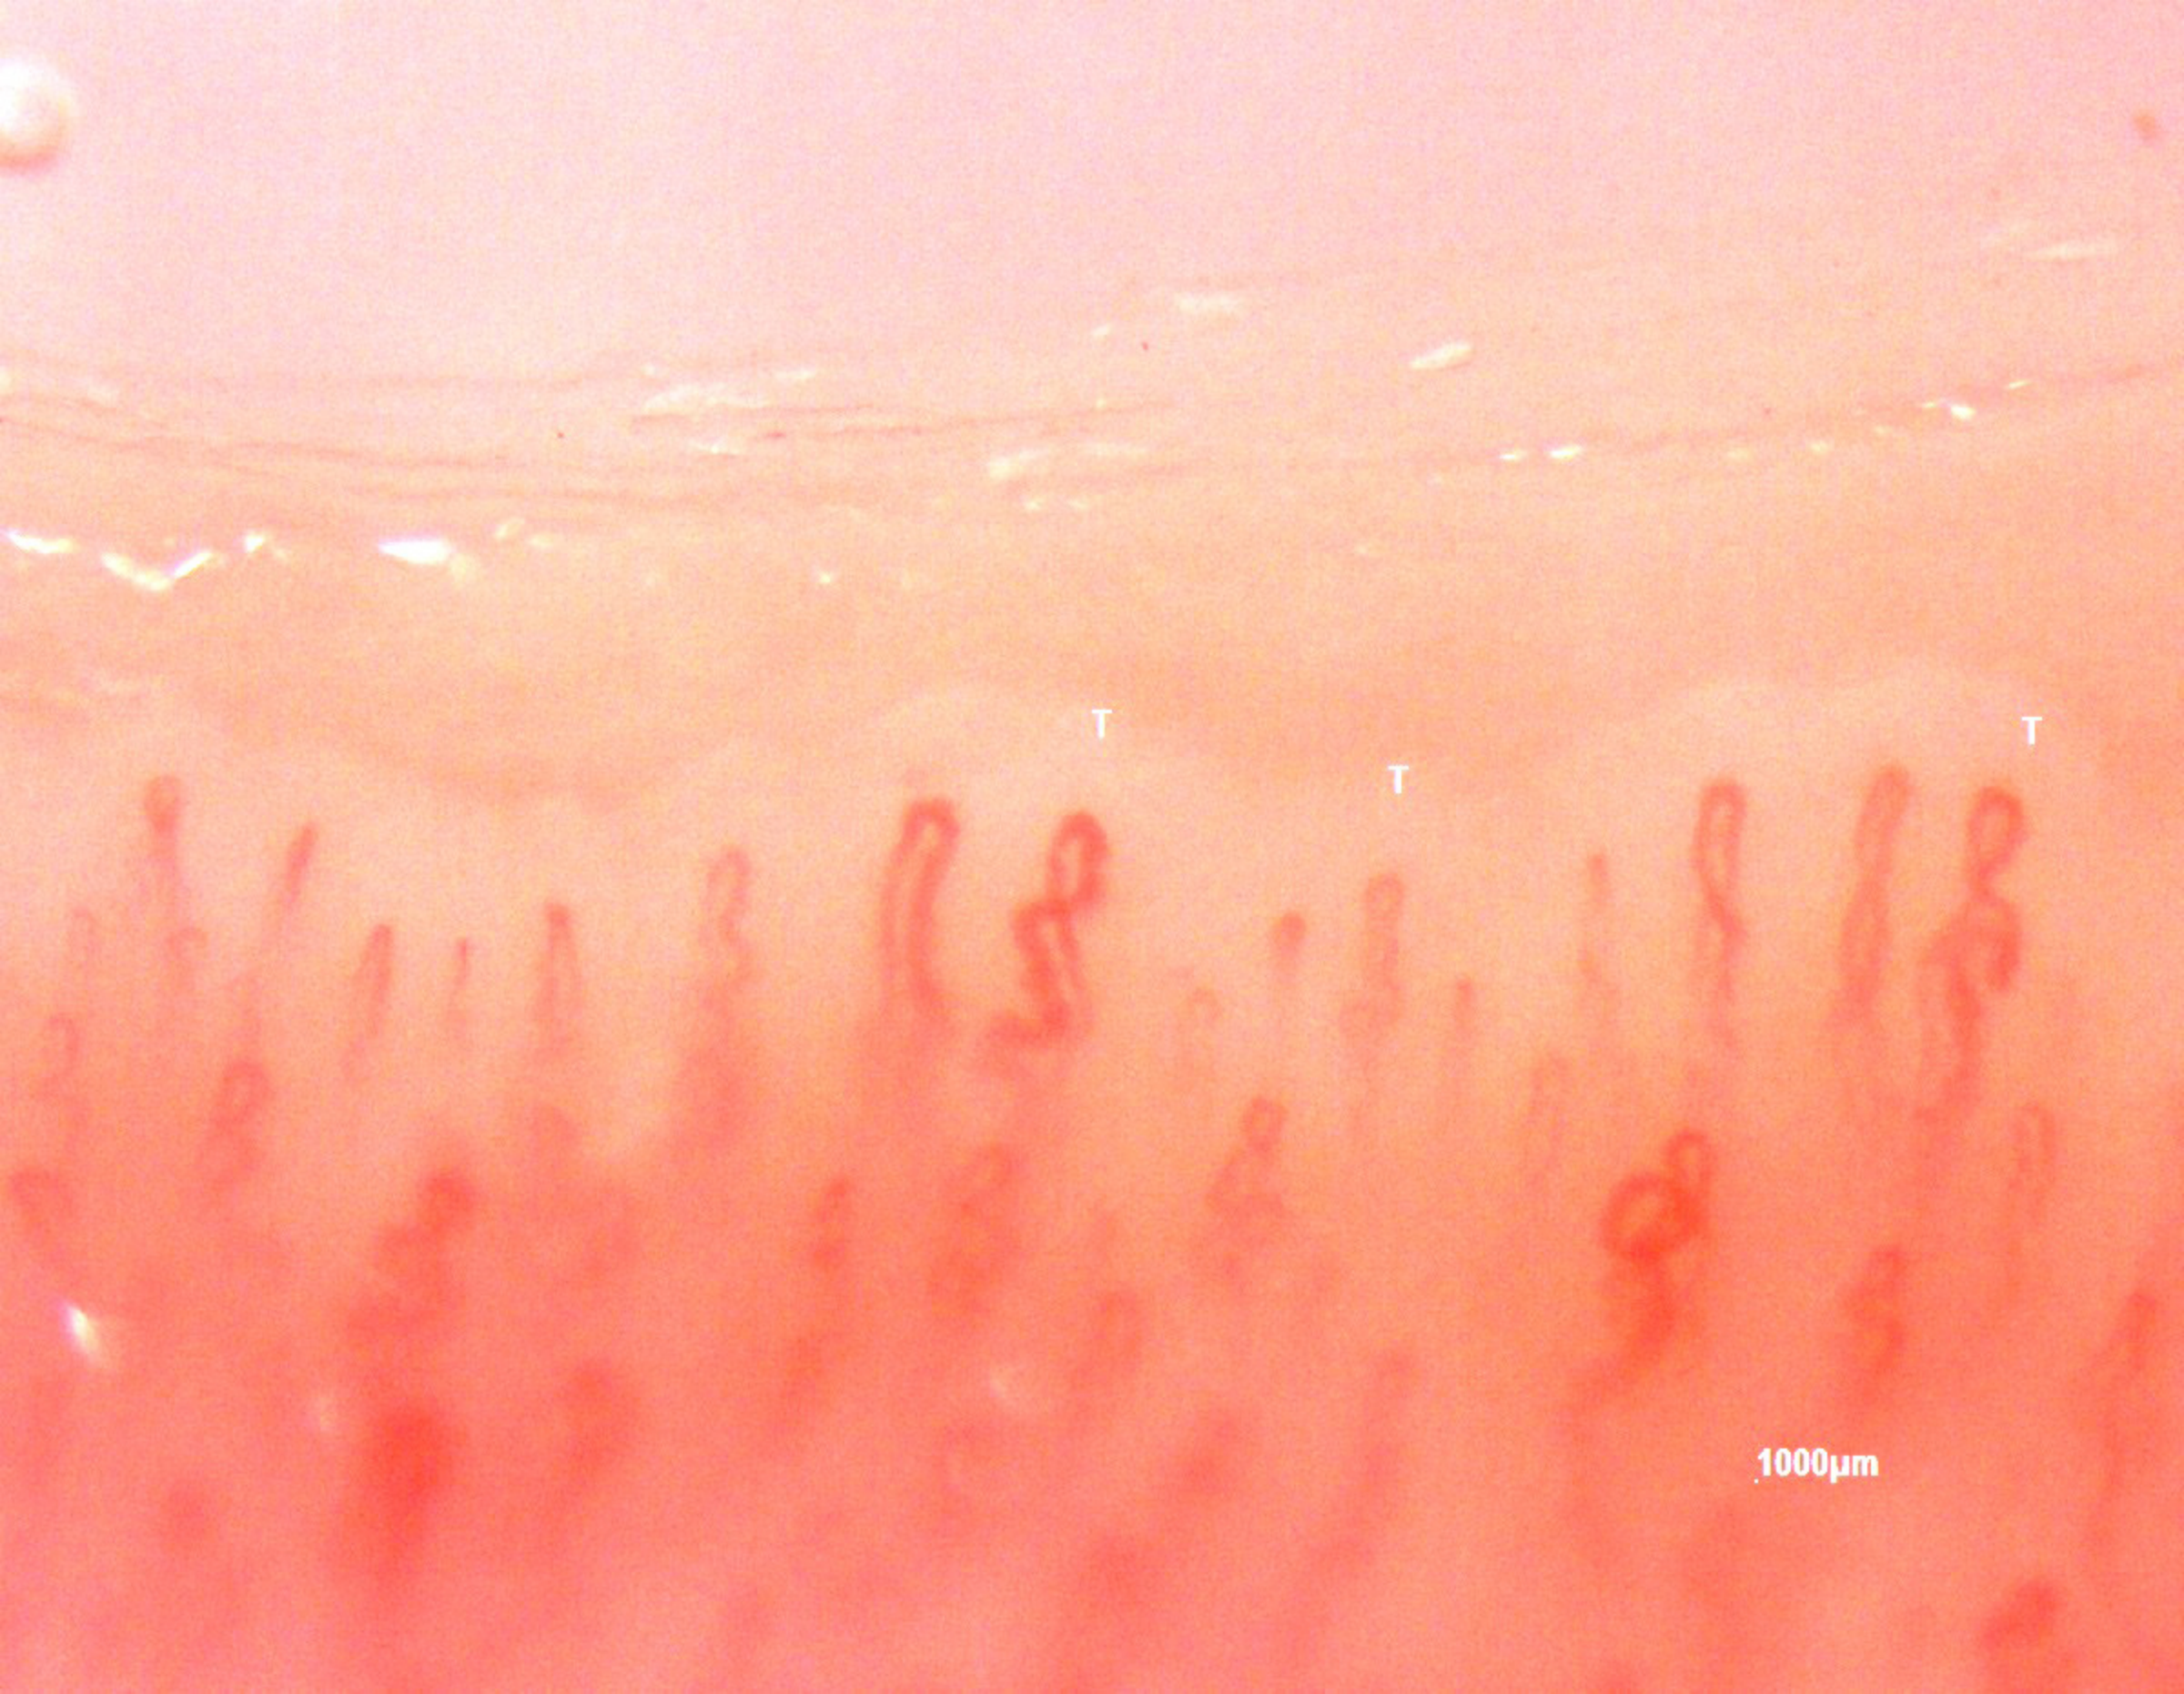

T

T

T

1000µm

Supplement: 0301-1526_a000553_esm14.pdf [file 0301-1526_a000553_esm14.pdf]

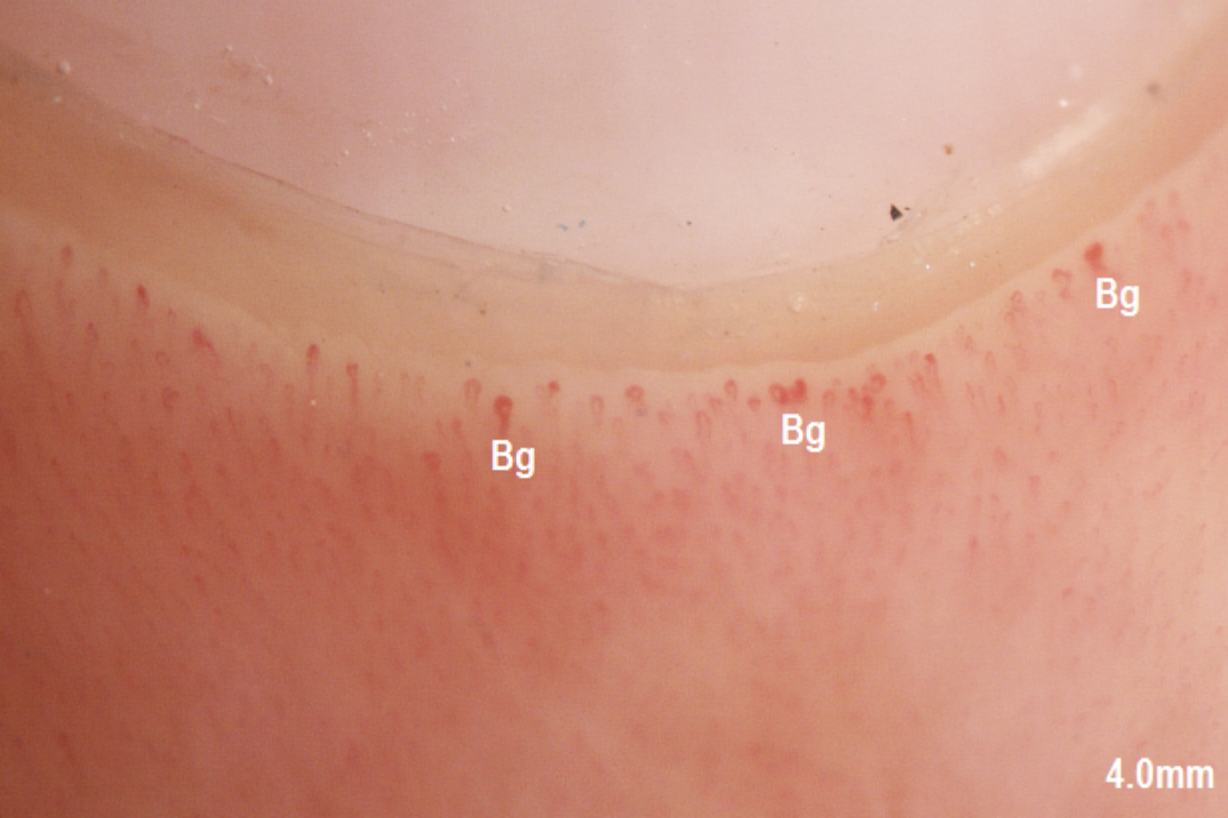

Bg

Bg

Bg

4.0mm

Supplement: 0301-1526_a000553_esm2.pdf [file 0301-1526_a000553_esm2.pdf]

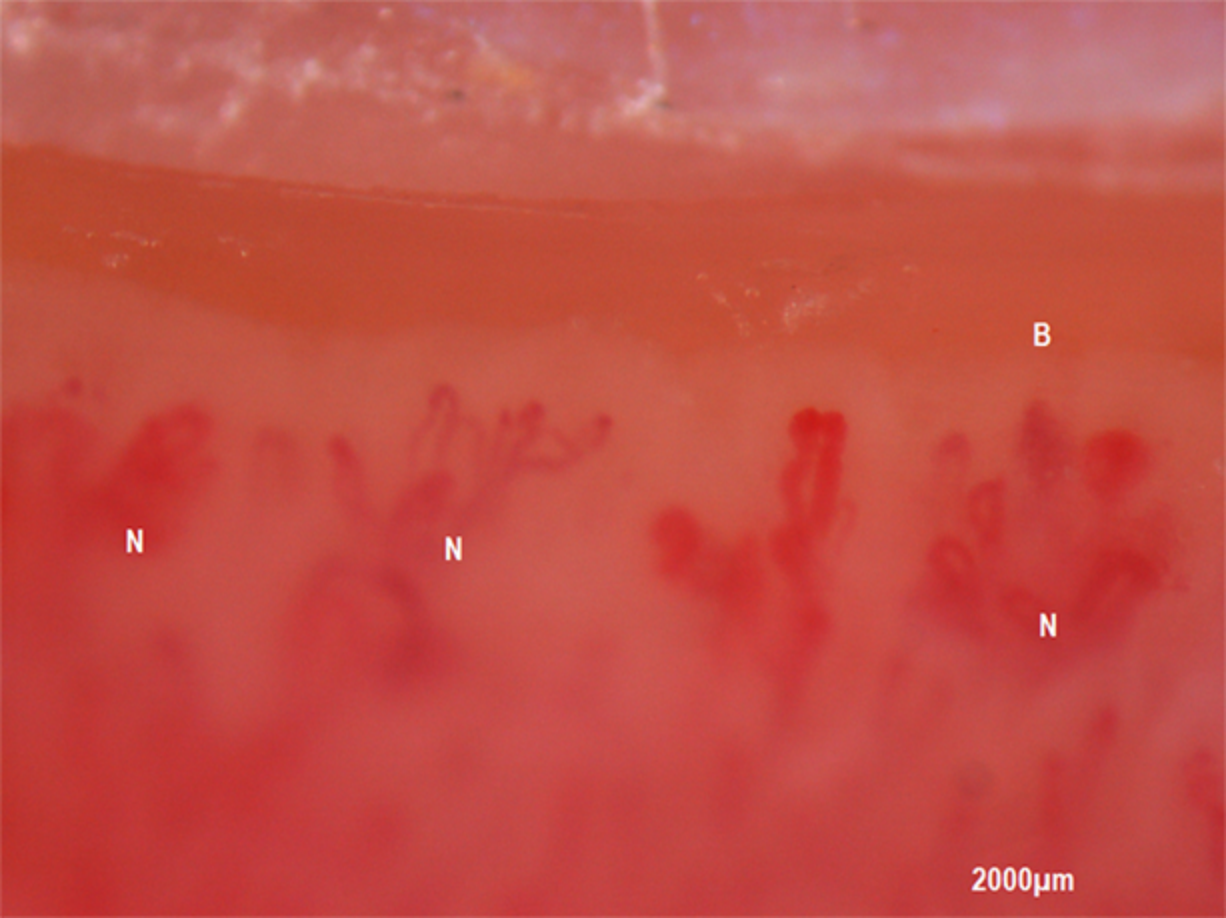

N

N

B

N

2000µm

Supplement: 0301-1526_a000553_esm5.pdf [file 0301-1526_a000553_esm5.pdf]

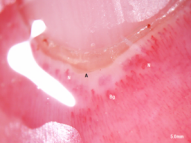

Fig

Supplement: 0301-1526_a000553_esm6.pdf [file 0301-1526_a000553_esm6.pdf]

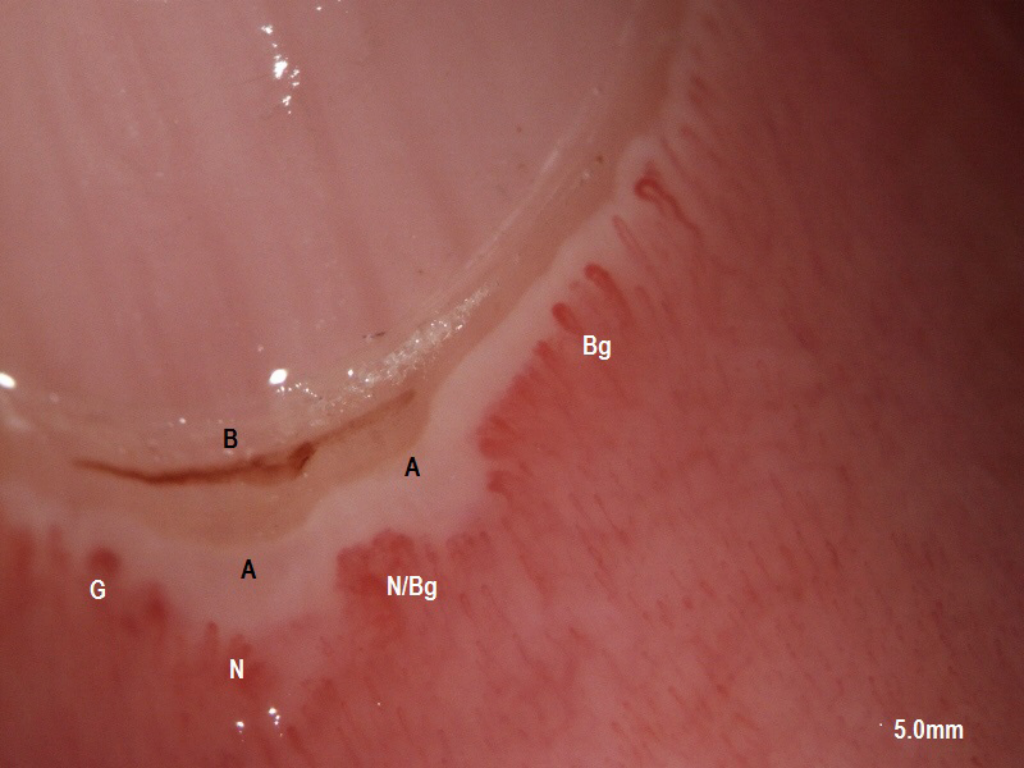

B

A

Bg

G

A

N/Bg

N

5.0mm

Supplement: 0301-1526_a000553_esm7.pdf [file 0301-1526_a000553_esm7.pdf]

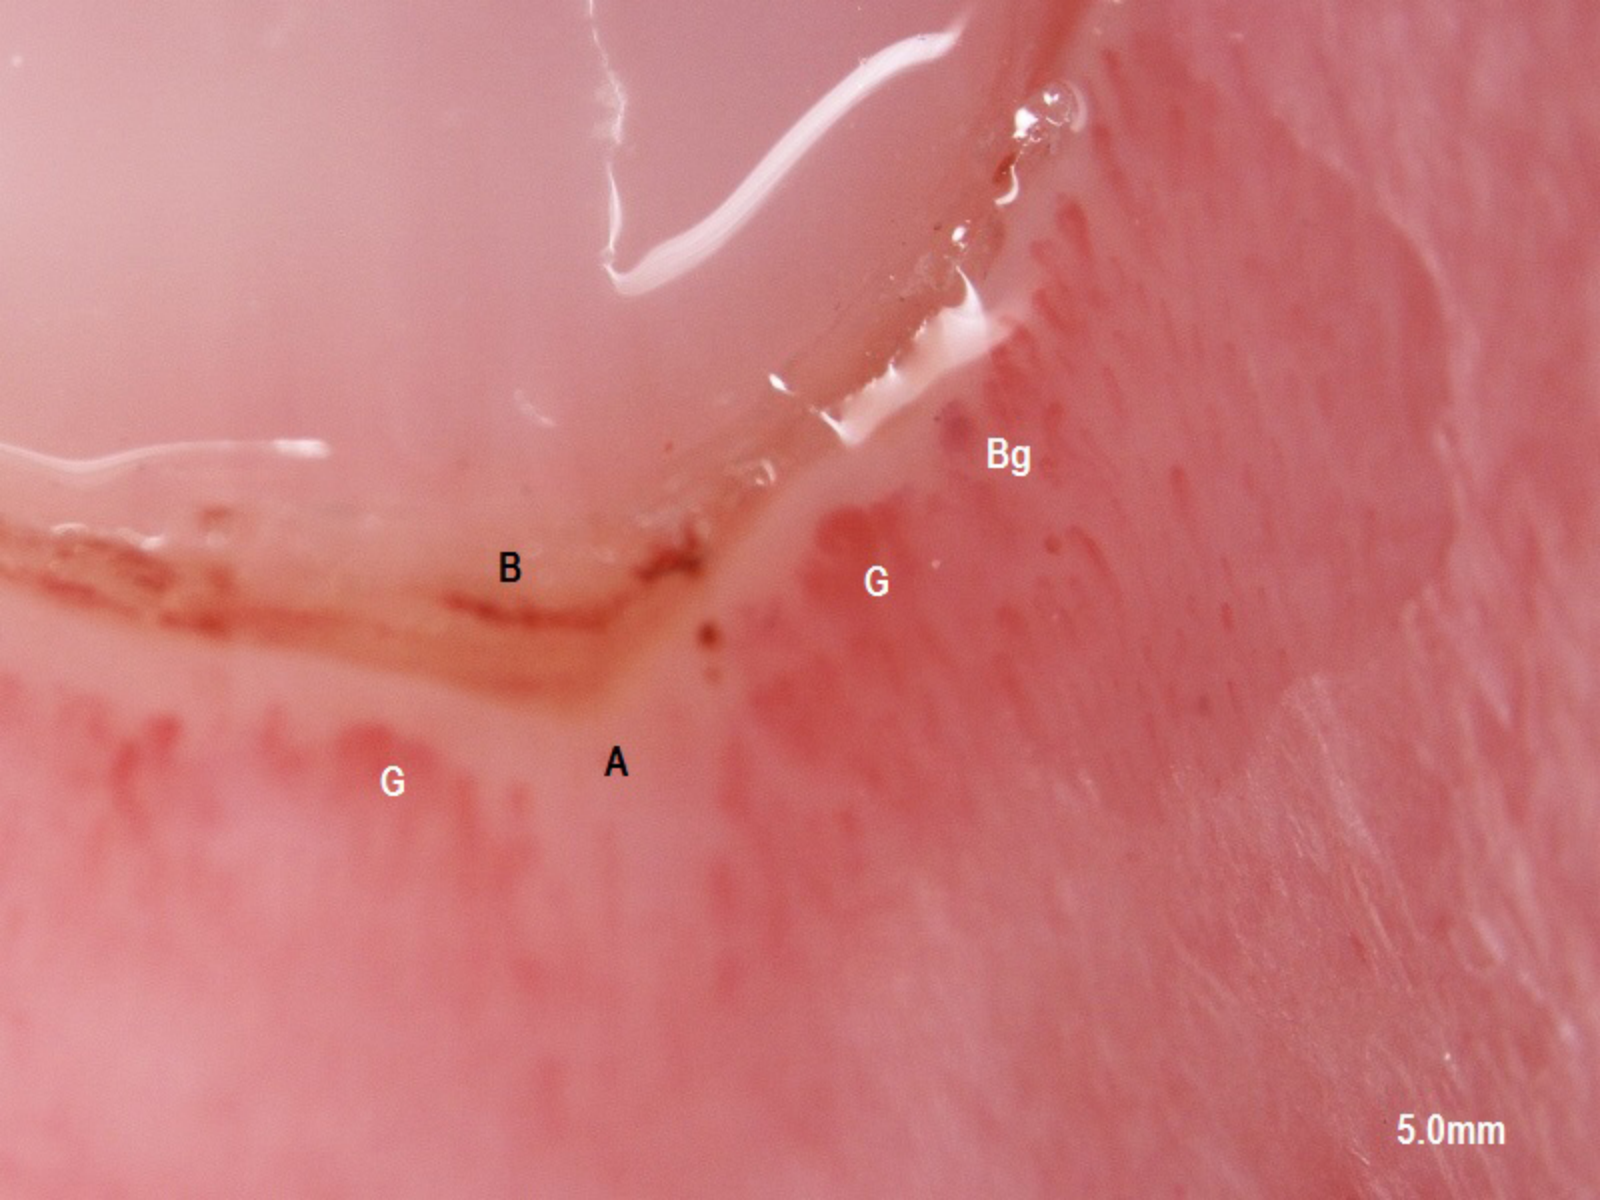

B

Bg

G

G

A

5.0mm

Supplement: 0301-1526_a000553_esm8.pdf [file 0301-1526_a000553_esm8.pdf]
